# Supplementary material
Source: PubMed Central journal article supplement (PMC4861155)
Supplement: NIHMS775633-supplement-Supplement1.pdf [file NIHMS775633-supplement-Supplement1.pdf]

## Supplementary Appendix

This appendix has been provided by the authors to give readers additional information about their work.

Supplement to: Finer LB, Zolna MR. Declines in unintended pregnancy in the United States, 2008–2011. *N Engl J Med* 2016;374:843-52. DOI: 10.1056/NEJMsa1506575

# **Declines in Unintended Pregnancy in the United States, 2008–2011**

Lawrence B. Finer

Mia R. Zolna

## **Supplementary materials**

### Contents

Supplementary Table S1. Percentage of Pregnancies Unintended and Unintended Pregnancy Rate with Associated Confidence Intervals for All U.S. Women for 2008 and 2011, and by Demographic Characteristics for 2011

**SUPPLEMENTARY TABLE S1—Percentage of Pregnancies Unintended and Unintended Pregnancy Rate with Associated Confidence Intervals for All U.S. Women for 2008 and 2011, and by Demographic Characteristics for 2011**

|                                               | <u>Unintended pregnancies, %</u><br>Estimate (CI) | <u>Unintended pregnancy rate<sup>a</sup></u><br>Estimate (CI) |
|-----------------------------------------------|---------------------------------------------------|---------------------------------------------------------------|
| <b>All women, year</b>                        |                                                   |                                                               |
| 2008                                          | 51% (48%, 55%)                                    | 54 (51, 58)                                                   |
| 2011                                          | 45% (42%, 50%)                                    | 45 (41, 49)                                                   |
| <b>Characteristics, 2011</b>                  |                                                   |                                                               |
| <b>Age group, years<sup>b</sup></b>           |                                                   |                                                               |
| 15–19                                         | 82% (71%, 79%)                                    | 41 (39, 42)                                                   |
| 15–17                                         | 91% (68%, 76%)                                    | 20 (19, 21)                                                   |
| 18–19                                         | 77% (73%, 79%)                                    | 71 (68, 73)                                                   |
| 20–24                                         | 64% (54%, 63%)                                    | 81 (75, 87)                                                   |
| 25–29                                         | 45% (36%, 48%)                                    | 66 (56, 75)                                                   |
| 30–34                                         | 35% (25%, 37%)                                    | 43 (35, 52)                                                   |
| ≥35                                           | 39% (27%, 40%)                                    | 16 (13, 19)                                                   |
| <b>Relationship status</b>                    |                                                   |                                                               |
| Currently married                             | 31% (19%, 29%)                                    | 29 (23, 35)                                                   |
| Never-married, not cohabiting                 | 82% (77%, 84%)                                    | 36 (35, 38)                                                   |
| Formerly married, not cohabiting              | 68% (66%, 72%)                                    | 54 (51, 56)                                                   |
| Cohabiting                                    | 63% (51%, 60%)                                    | 141 (129, 153)                                                |
| <b>Income as a % of federal poverty level</b> |                                                   |                                                               |
| <100%                                         | 65% (58%, 64%)                                    | 112 (106, 118)                                                |
| 100–199%                                      | 55% (47%, 58%)                                    | 58 (52, 64)                                                   |
| ≥200%                                         | 38% (25%, 35%)                                    | 20 (17, 24)                                                   |
| <b>Educational attainment<sup>c</sup></b>     |                                                   |                                                               |
| Not a high school graduate                    | 54% (38%, 51%)                                    | 73 (62, 83)                                                   |
| HS graduate or GED                            | 52% (49%, 60%)                                    | 59 (53, 65)                                                   |
| Some college or associate's degree            | 53% (41%, 50%)                                    | 46 (41, 51)                                                   |
| College graduate                              | 31% (21%, 33%)                                    | 25 (19, 31)                                                   |
| <b>Race and ethnicity<sup>d</sup></b>         |                                                   |                                                               |
| White non-Hispanic                            | 42% (33%, 43%)                                    | 33 (28, 37)                                                   |
| Black non-Hispanic                            | 69% (59%, 69%)                                    | 79 (73, 85)                                                   |
| Hispanic                                      | 56% (45%, 56%)                                    | 58 (52, 64)                                                   |
| <b>Religious affiliation</b>                  |                                                   |                                                               |
| Protestant                                    | 50% (41%, 51%)                                    | 43 (38, 47)                                                   |
| Mainline Protestant                           | 53% (48%, 58%)                                    | 51 (46, 56)                                                   |
| Evangelical Protestant                        | 48% (33%, 45%)                                    | 35 (30, 41)                                                   |
| Catholic                                      | 49% (41%, 52%)                                    | 48 (42, 53)                                                   |
| Other                                         | 44% (26%, 43%)                                    | 38 (28, 47)                                                   |
| None                                          | 59% (43%, 56%)                                    | 50 (43, 56)                                                   |

<sup>a</sup> Rates are per 1,000 women ages 15 to 44. <sup>b</sup> Women <15 excluded because of insufficient data. For ≥35 category, numerator is pregnancies to women ages 35 and older; population denominator is women ages 35 to 44. <sup>c</sup> Among women 20 years and older. <sup>d</sup> Excludes women who self-identify as other race/ethnic groups.
